# Supplementary material for: Inducing and monitoring mitochondrial pH changes with an iridium(iii) complex via two-photon lifetime imaging
Source: Royal Society of Chemistry journal article supplement (doi:10.1039/d3dt02541a), 2023-01-01
Supplement: d3dt02541a1.pdf [file d3dt02541a1.pdf]

## **Inducing and monitoring mitochondrial pH changes with a iridium(III) complex via two-photon lifetime imaging**

Meng Hu,<sup>a</sup> Xin-Lan Zhou,<sup>a</sup> Tian-Xin Xiao,<sup>a</sup> Liang Hao<sup>b,\*</sup> and Yi Li<sup>a,\*</sup>

<sup>a</sup> Key Laboratory of Theoretical Organic Chemistry and Function Molecule, Ministry of Education, School of Chemistry and Chemical Engineering, Hunan University of Science and Technology, Xiangtan 411201, China

<sup>b</sup> MOE Key Laboratory of Bioinorganic and Synthetic Chemistry, School of Chemistry, Sun Yat-Sen University, Guangzhou 510275, China.

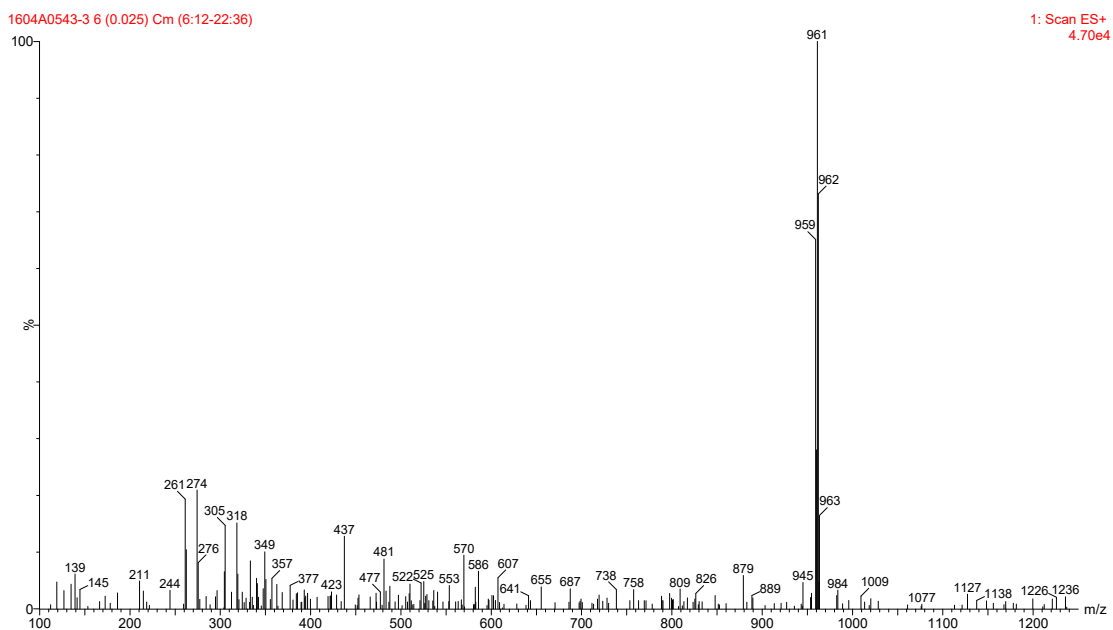

**Fig. S1** ESI-MS characterization of complex **MitoIr-NH**, 961[M-PF<sub>6</sub>]<sup>+</sup>.

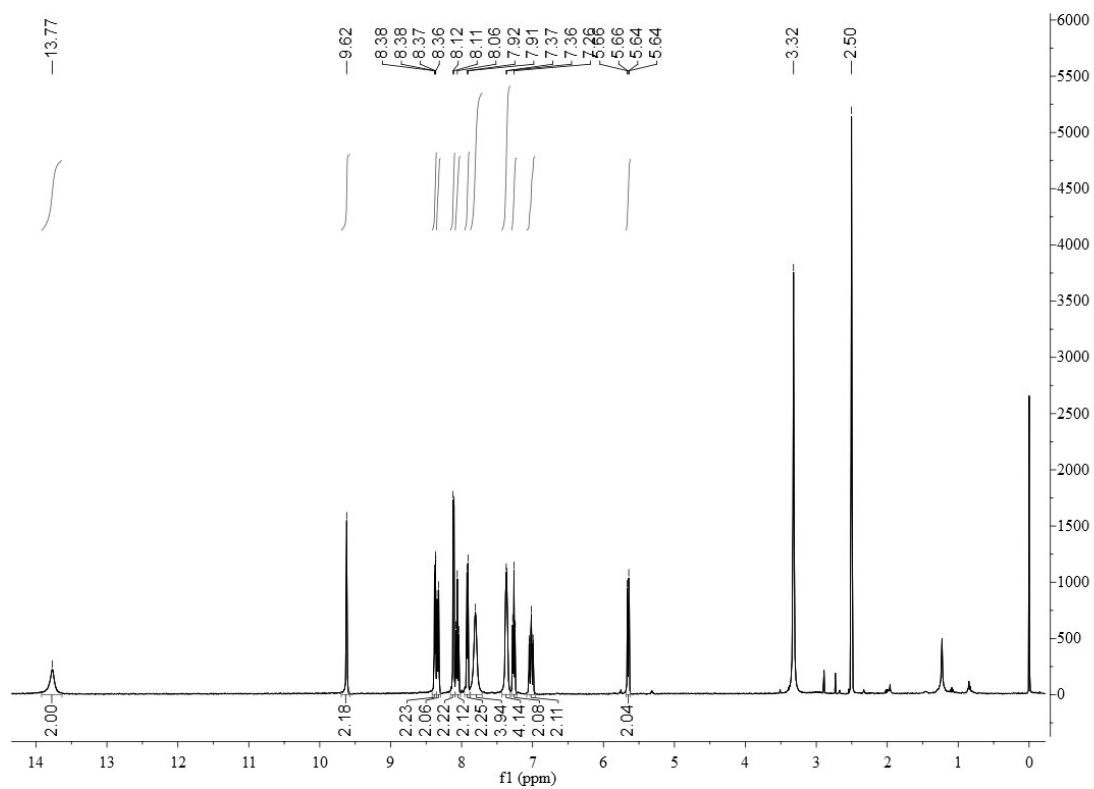

**Fig. S2** <sup>1</sup>H NMR characterization of complex **MitoIr-NH**.

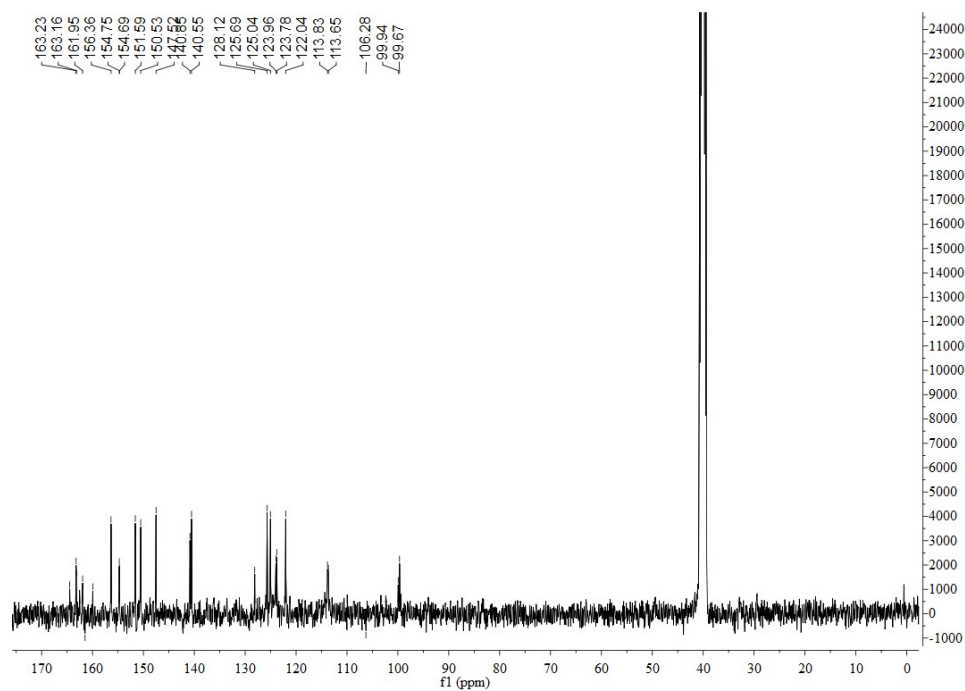

**Fig. S3**  $^{13}\text{C}$  NMR characterization of complex **MitoIr-NH**.

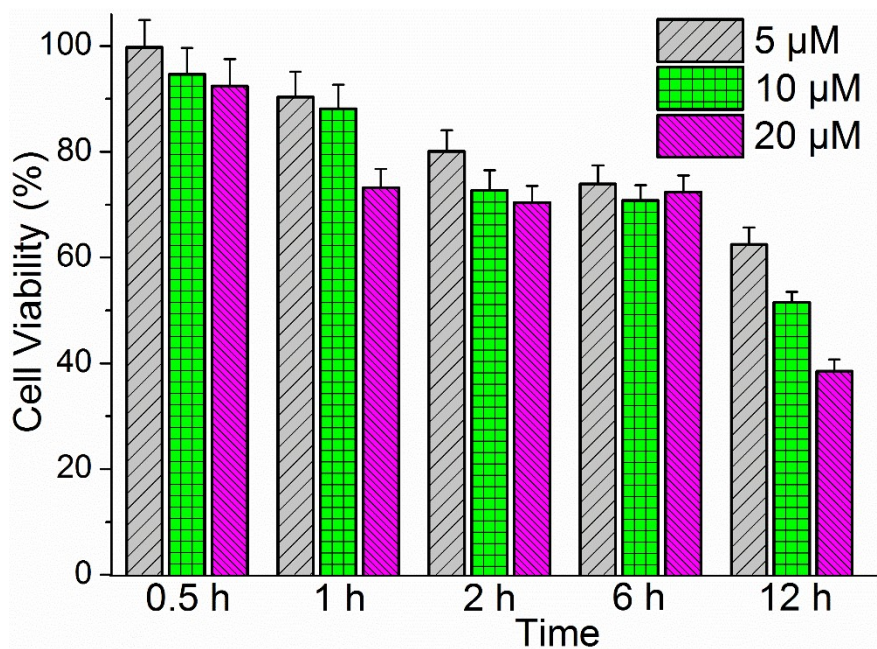

**Fig. S4** Cytotoxicity of **MitoIr-NH** determined by MTT assay. A549 cells were treated with complex **MitoIr-NH** at the indicated concentrations and time intervals.

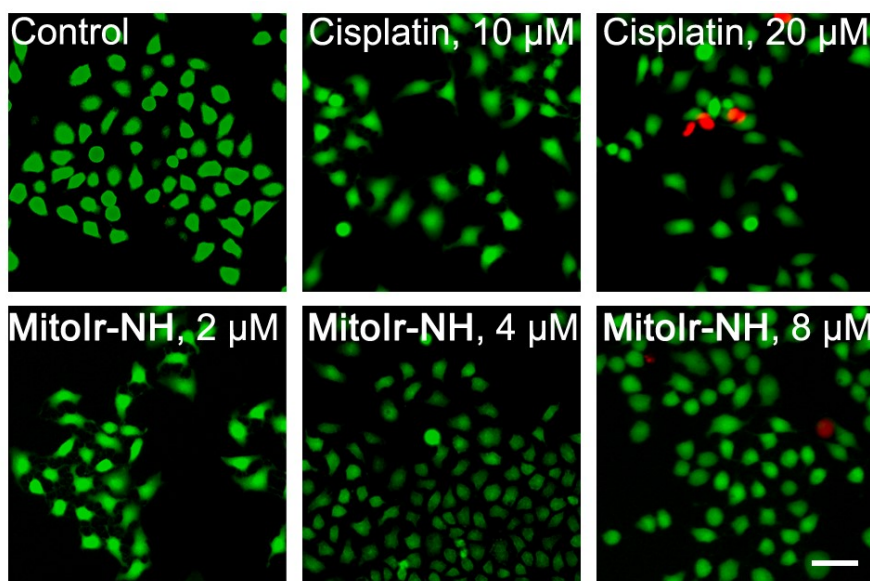

**Fig. S5** Fluorescence images of A549 cells costained with calcein AM (staining live cells, green color) and propidium iodide (staining dead cells, red color) after treated with complexes at indicated concentrations for 4 h. Scale bar: 50  $\mu\text{m}$ .

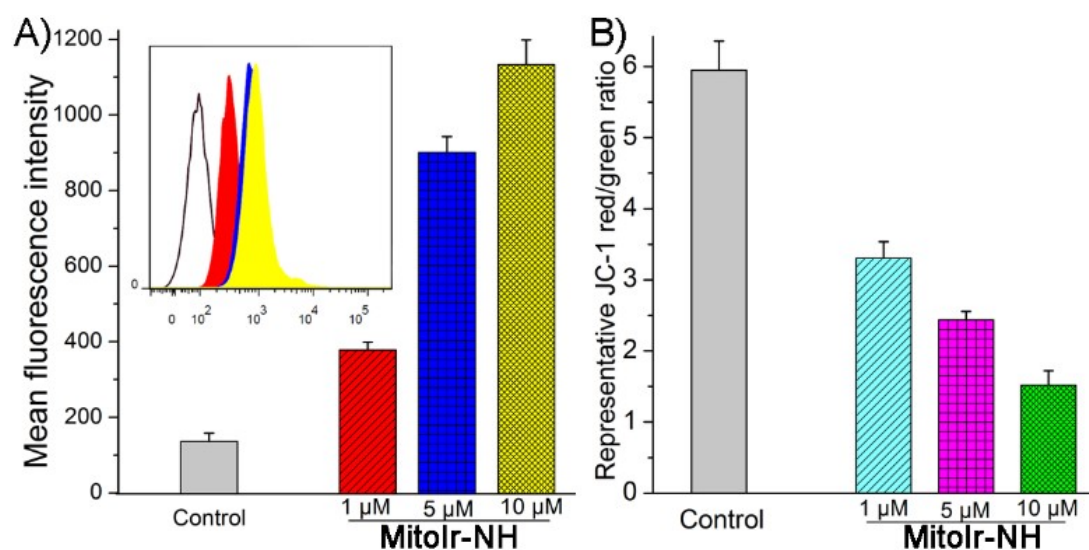

**Fig. S6** A) Intracellular ROS production measured by DCF fluorescence in A549 cells after treatment with complex **MitoIr-NH** at indicated concentrations for 6 h, insert: flow cytometry. B) Effects of complex **MitoIr-NH** on MMP analyzed by JC-1 staining and flow cytometry. A549 cells were treated with complex **MitoIr-NH** at the indicated concentrations for 6 h. JC-1 was excited at 488 nm and monitored simultaneously at  $530 \pm 15$  nm and  $590 \pm 15$  nm.

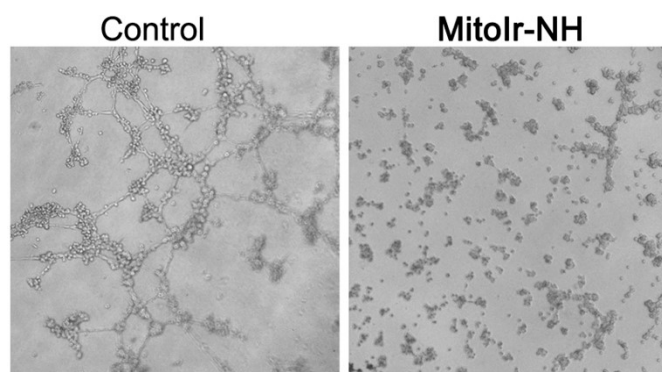

**Fig. S7** Effects of **MitoIr-NH** (0.5  $\mu$ M) against tube formation of EA.hy926 on matrigel. EA.hy926 cells were seeded on matrigel in medium were treated with **Ir1-Ir3** for 5 h.
